# Supplementary material for: Beyond trends and cycles: rainfall as a sequence of irregular regimes
Source: Copernicus journal article supplement (doi:10.5194/egusphere-2026-292), 2026-02-02

Fig.1

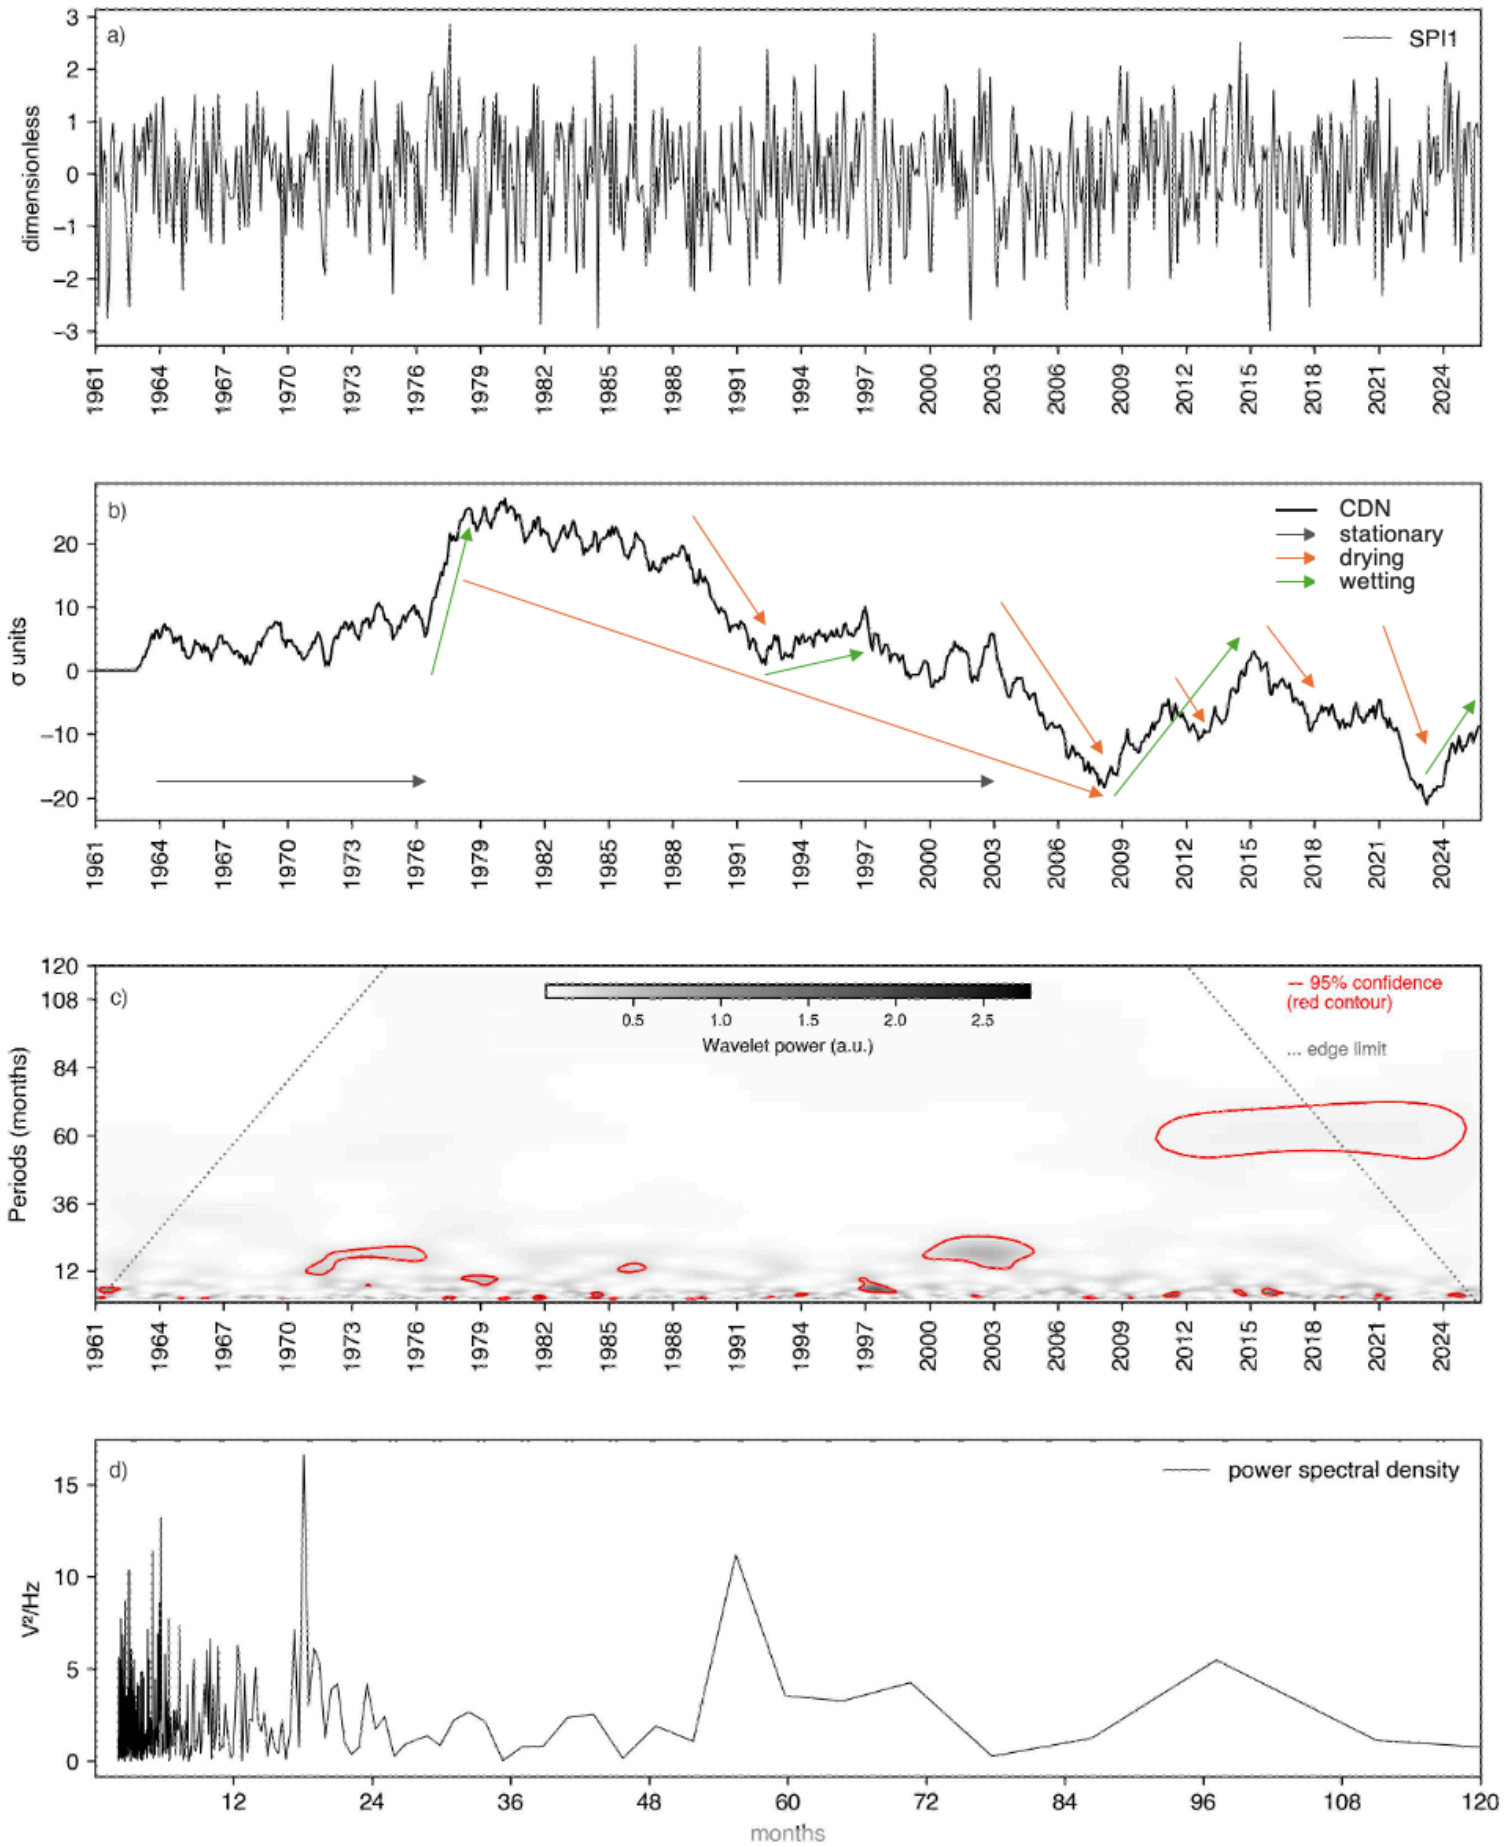

Fig.2

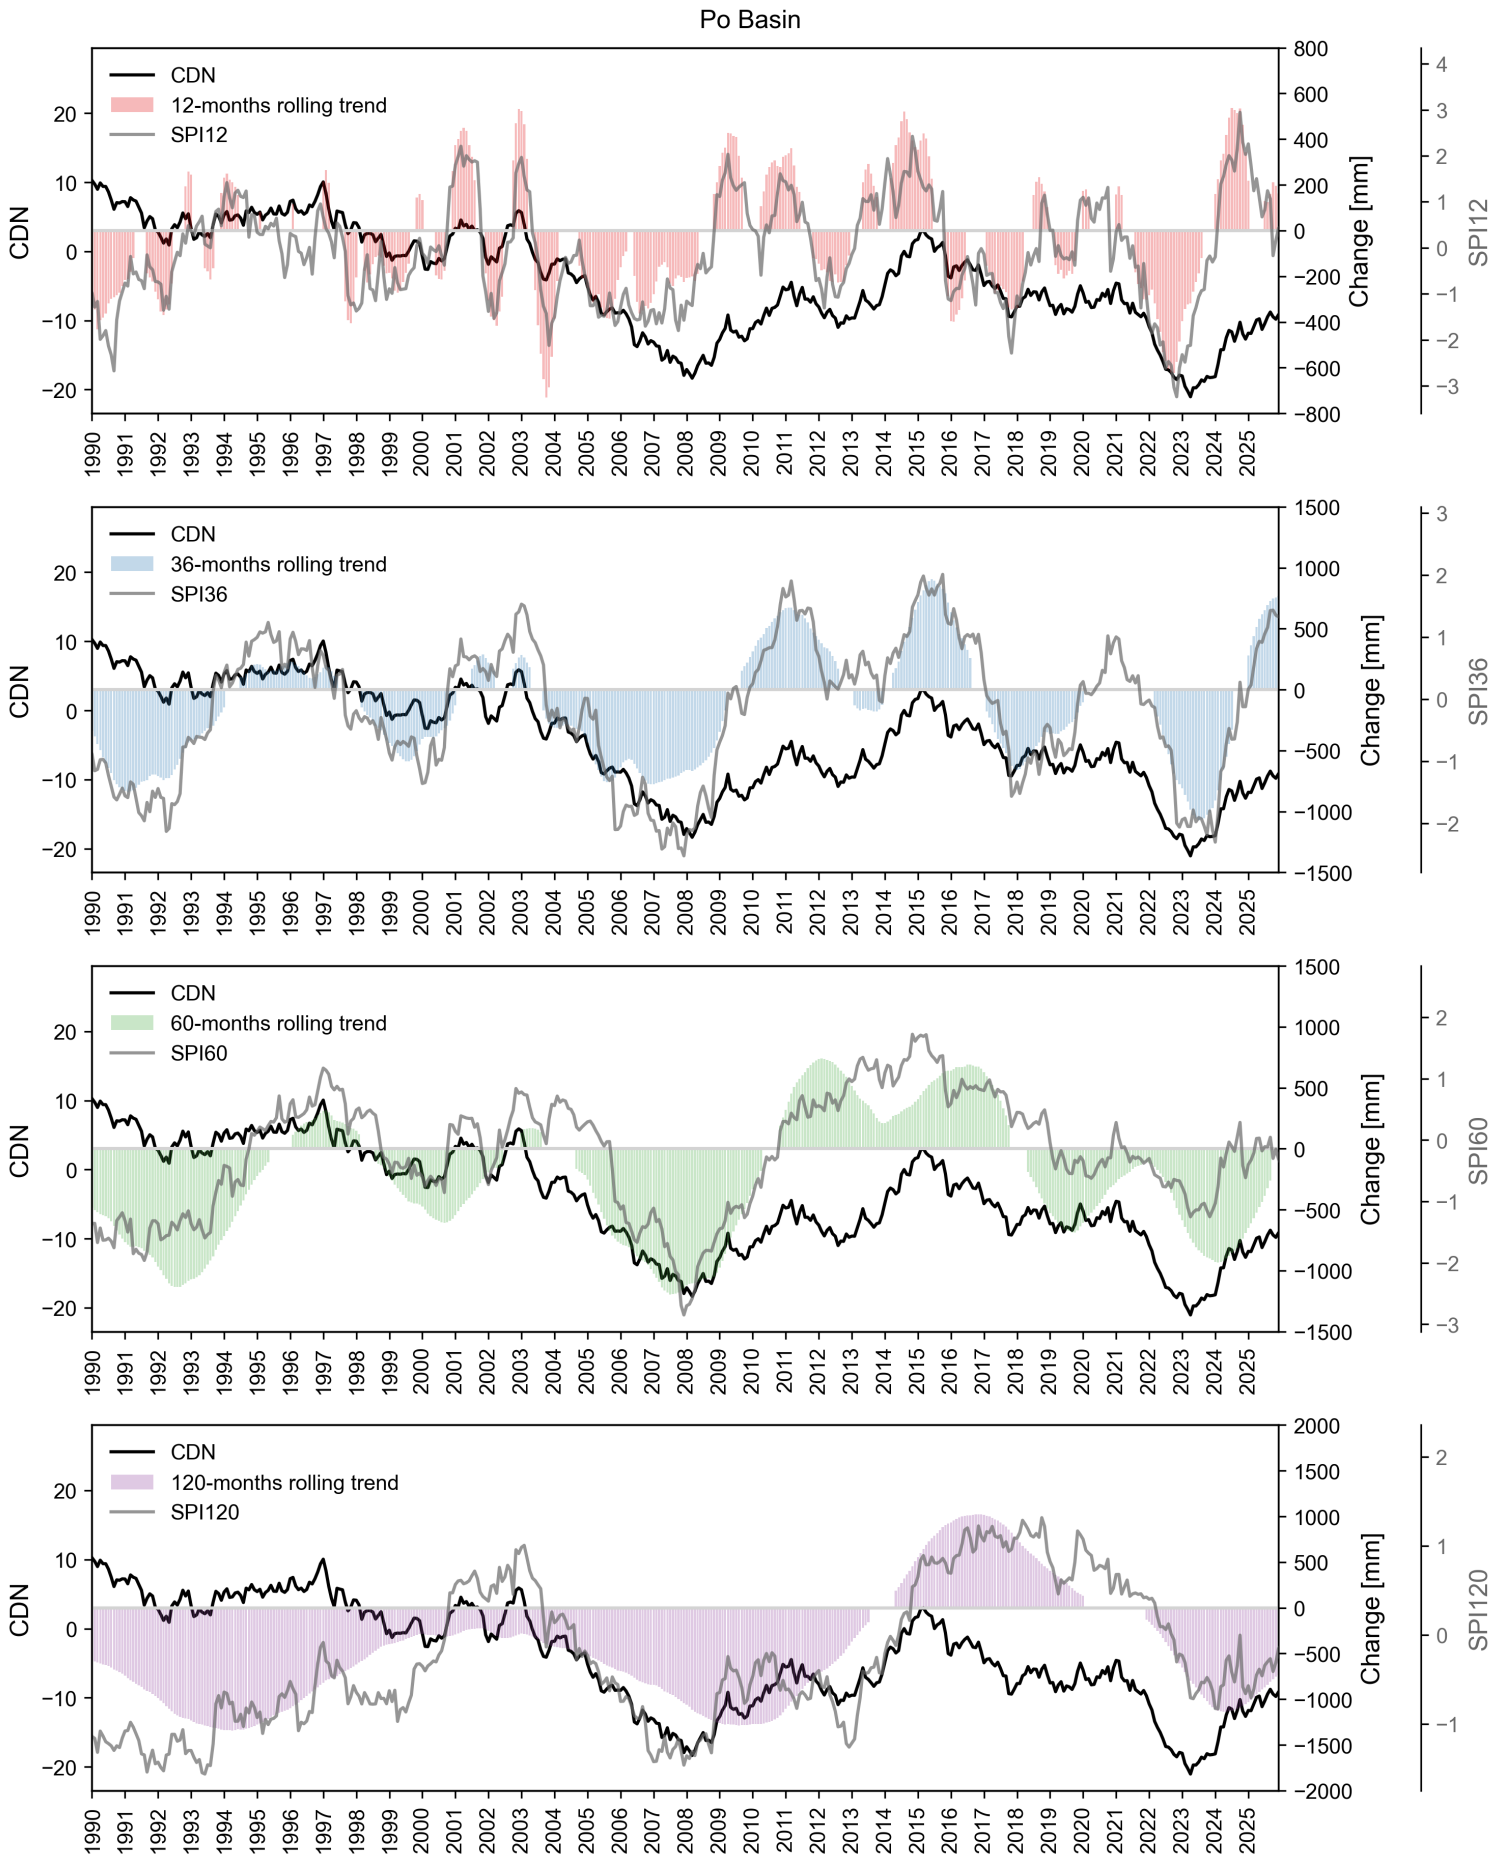

Supplement: Supplementary file [file egusphere-2026-292-CC2-supplement.pdf]
